# Supplementary material for: Preparation and characterization of an algal-based magnetic biochar nanocomposite for the removal of azocarmine G2 dye from aqueous solutions
Source: Springer Nature journal article supplement (doi:10.1186/s13065-025-01474-6), 2025-05-11
Supplement: MOESM1 [file 13065_2025_1474_MOESM1_ESM.pdf]

## **Supplementary figures for the Manuscript**

**Preparation and characterization of an algal-based magnetic  
biochar nanocomposite for the removal of azocarmine G2 dye  
from aqueous solutions**

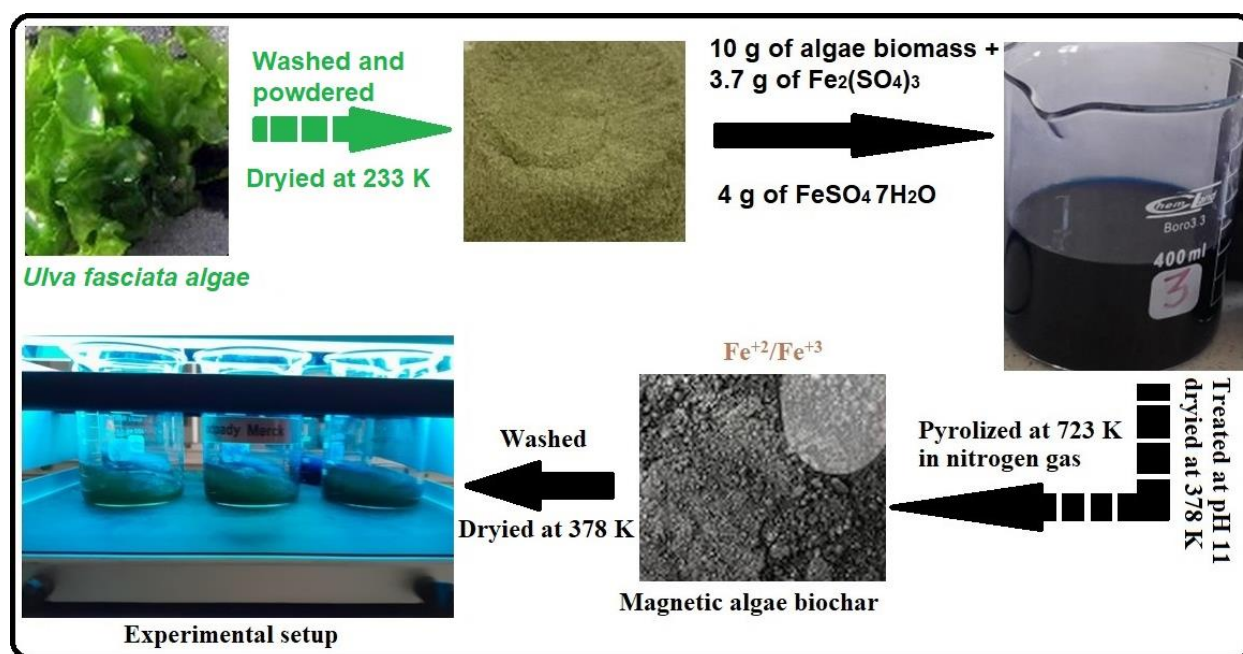

**Fig S 1:** Preparation of magnetic biochar  $\text{Fe}_3\text{O}_4@\text{BC}$  nanocomposites

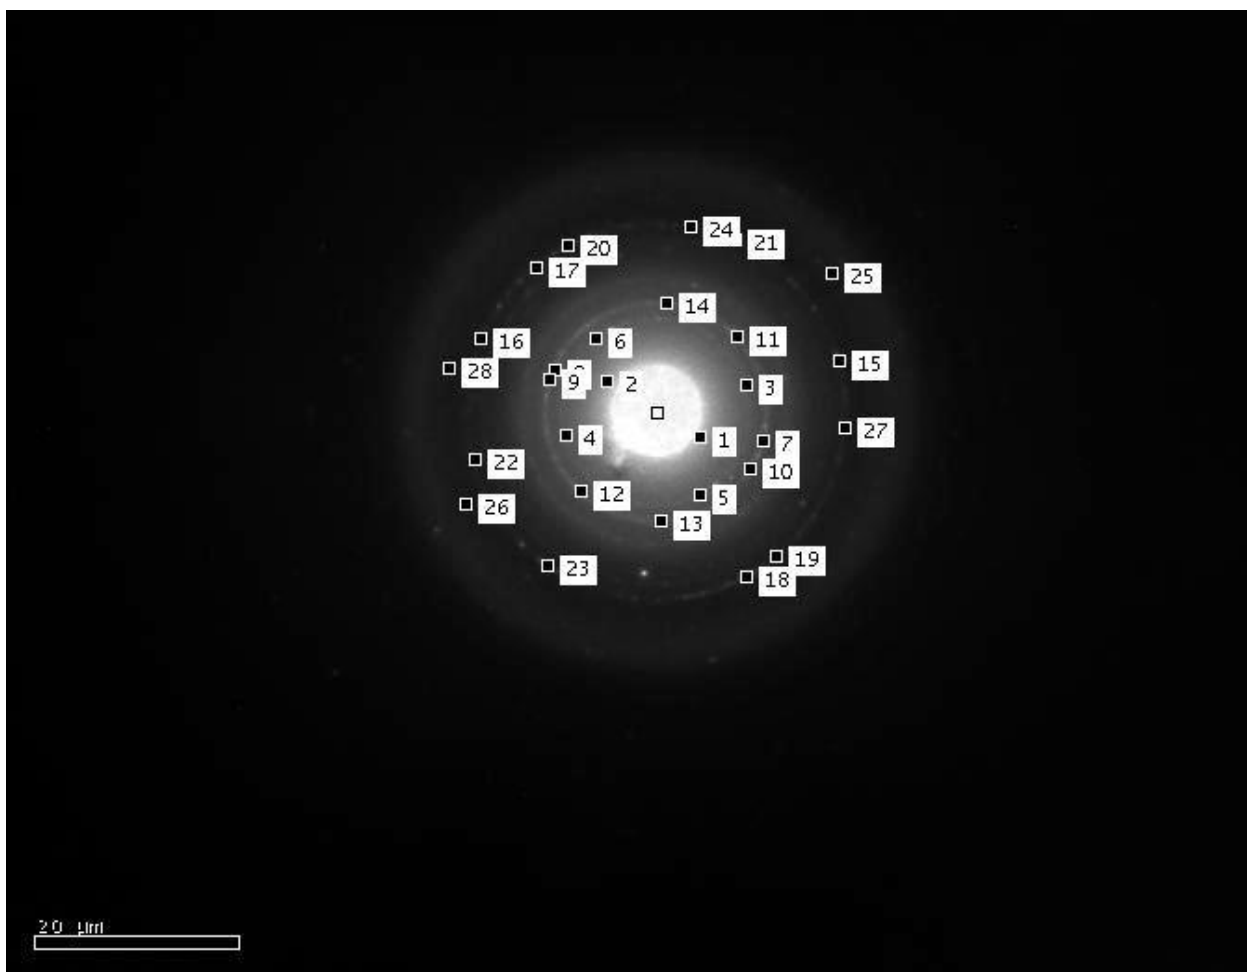

**Figure S 2:** Selective area electron diffraction (SAED) analysis of Fe<sub>3</sub>O<sub>4</sub>@BC

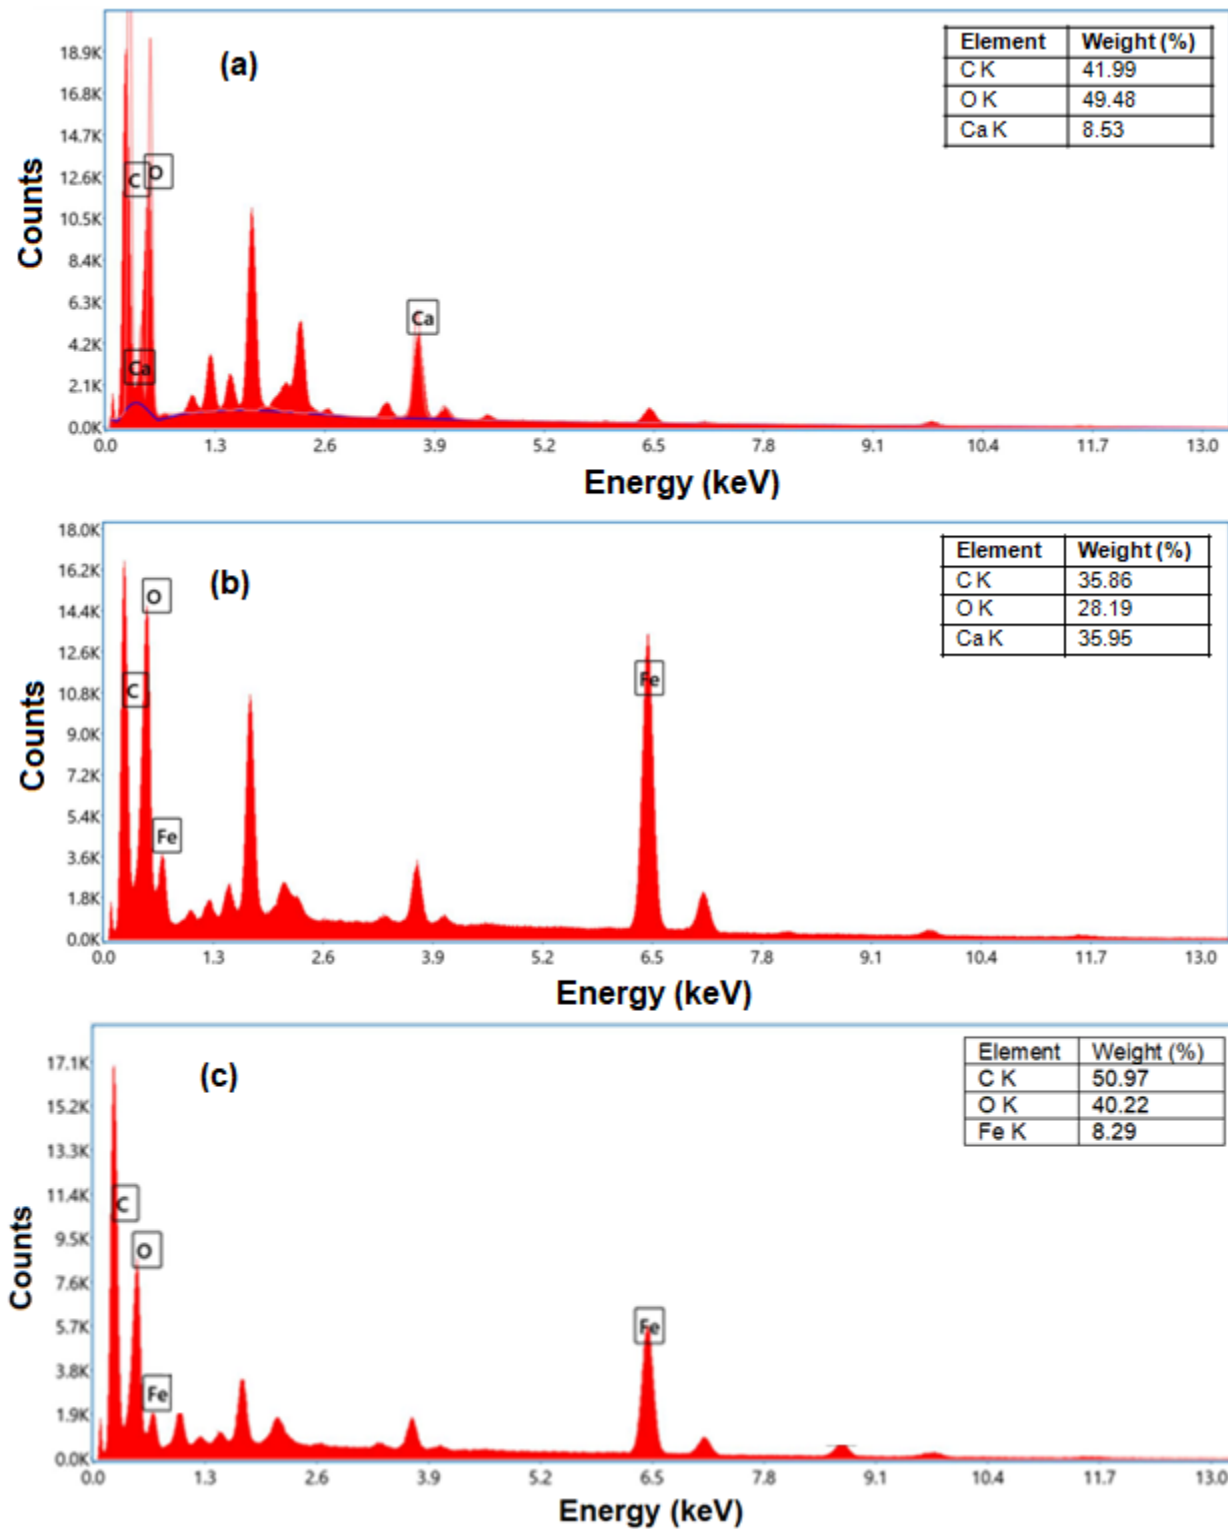

**Figure S 3:** EDX analysis of (a) BC, (b) Fe<sub>3</sub>O<sub>4</sub>@BC, and (c) Fe<sub>3</sub>O<sub>4</sub>@BC-ACG2

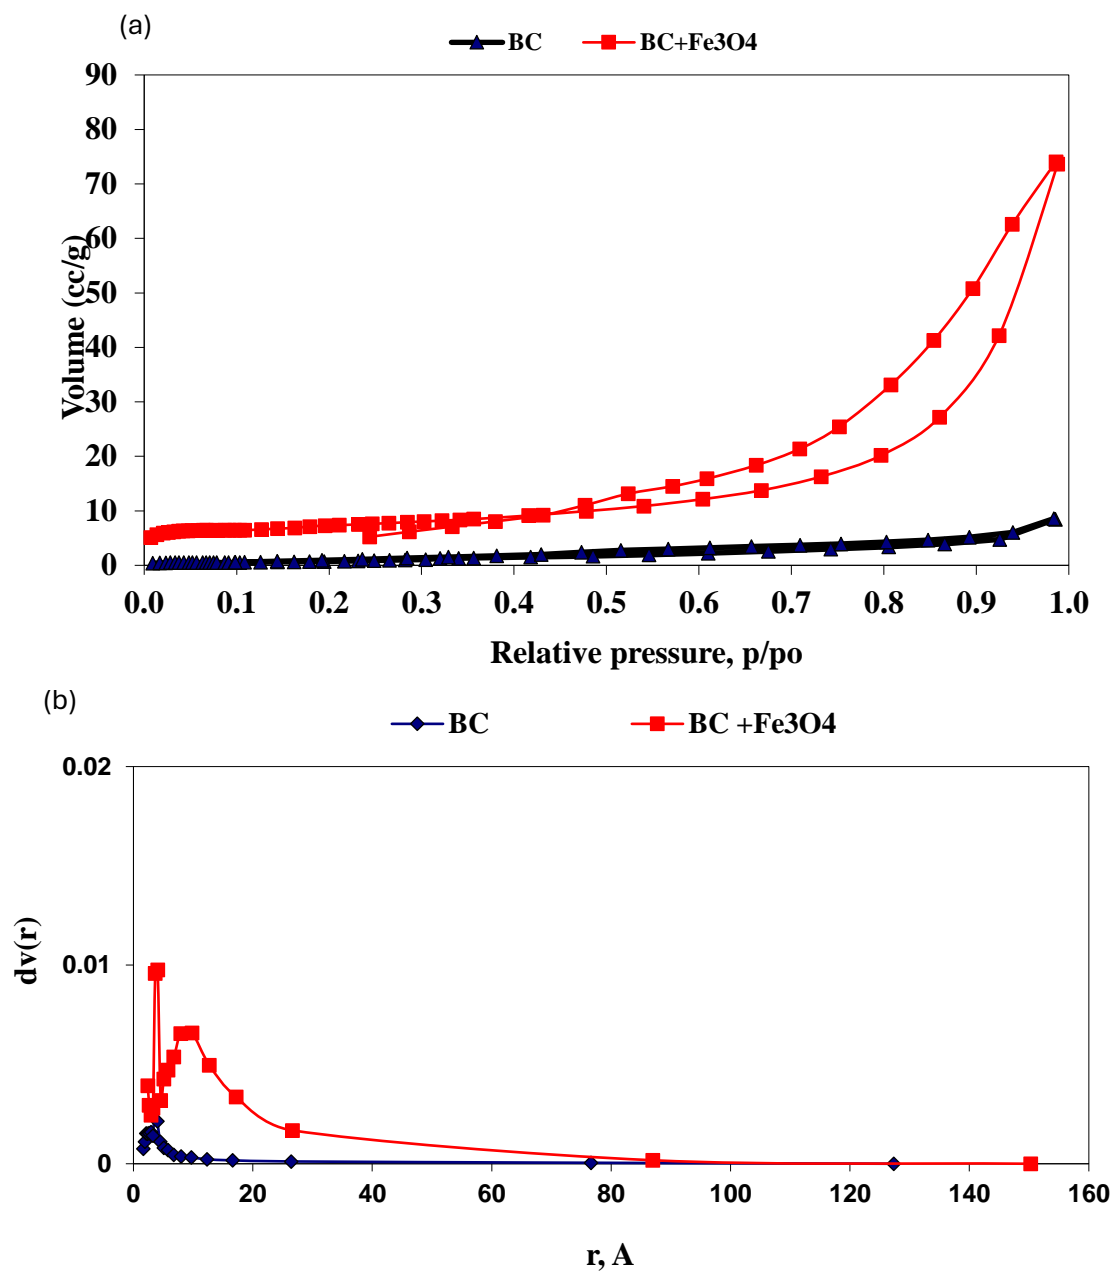

**Figure S4:** (a) N<sub>2</sub> adsorption–desorption isotherms of BC and Fe<sub>3</sub>O<sub>4</sub>@BC ; (b) BJH results obtained for BC and Fe<sub>3</sub>O<sub>4</sub>@BC

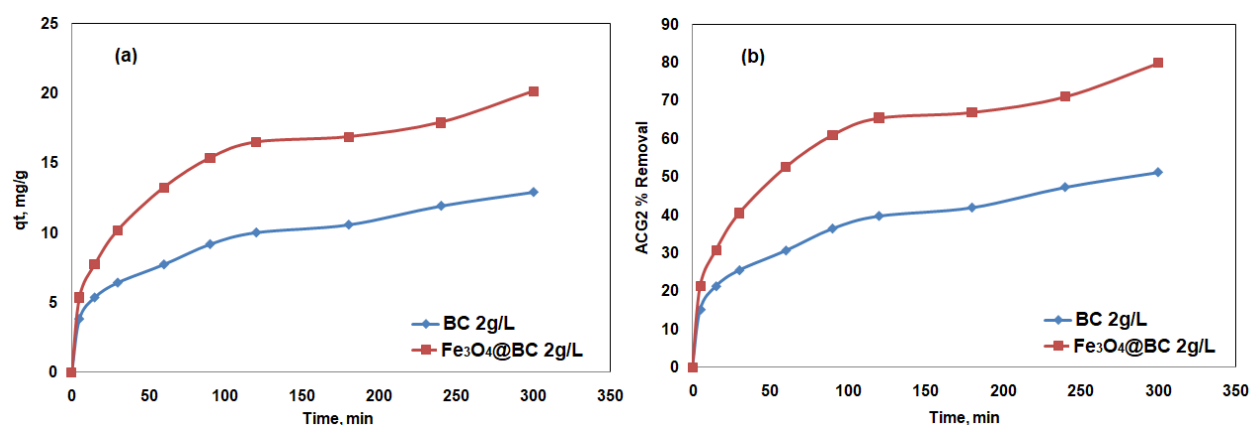

**Figure S 5:** Effect of time on adsorption of ACG2 on BC and  $\text{Fe}_3\text{O}_4@\text{BC}$

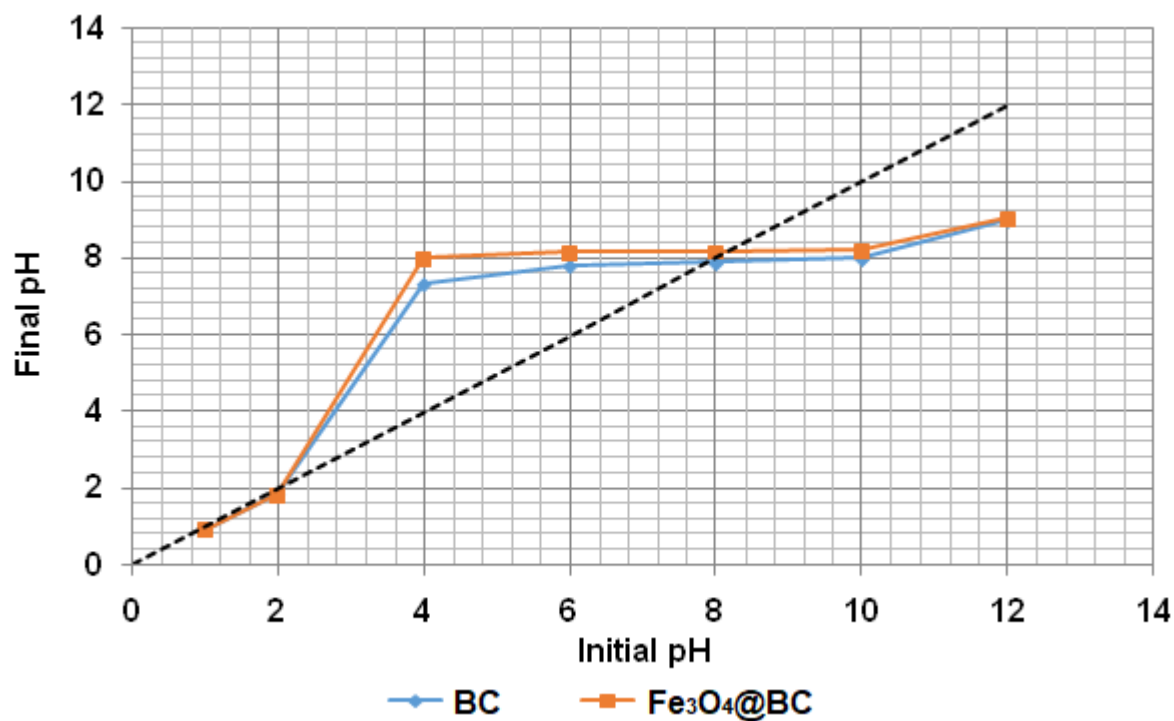

**Figure S 6:** pH PZC of adsorbents BC and  $\text{Fe}_3\text{O}_4@\text{BC}$

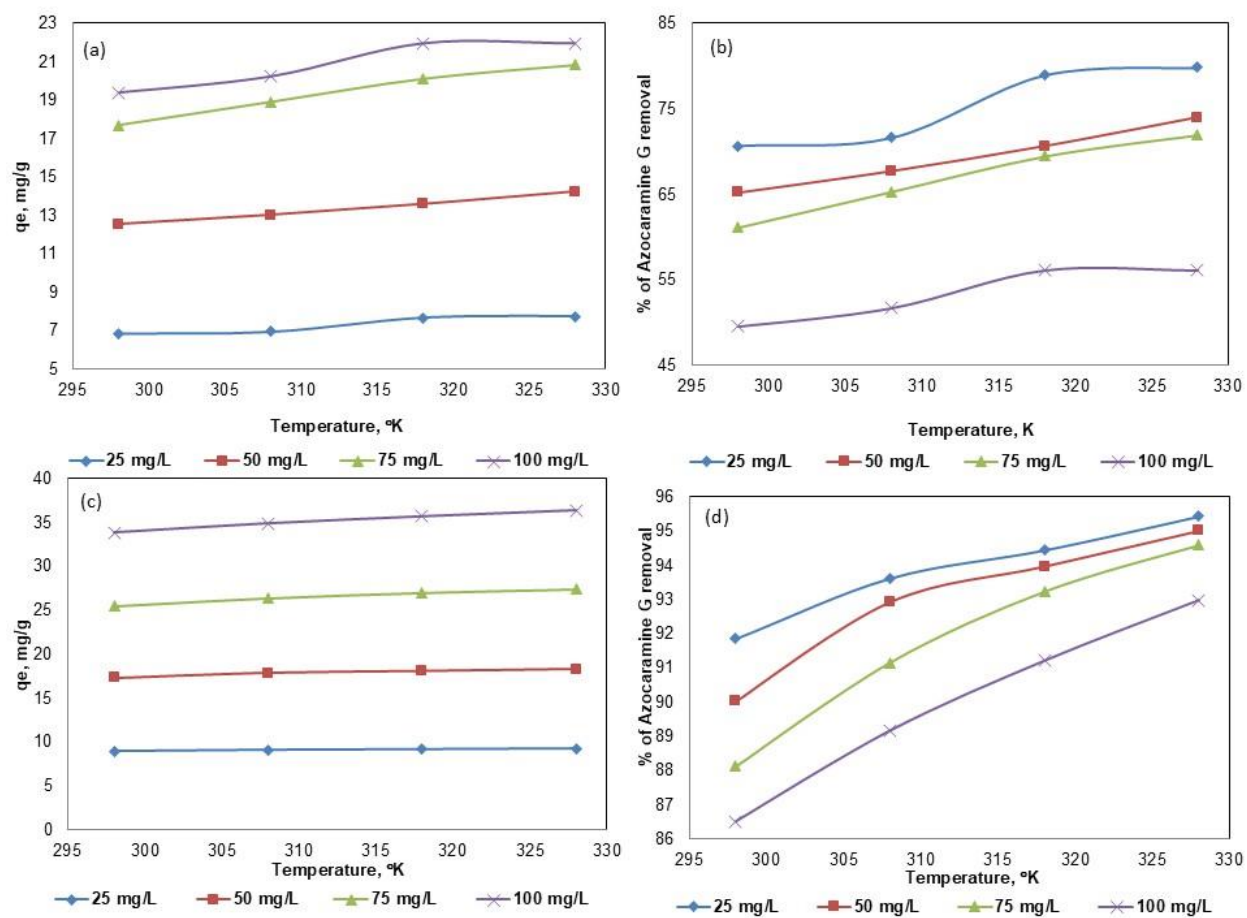

**Figure S 7:** Effect of temperature on adsorption of ACG2 on BC (a,b) and Fe<sub>3</sub>O<sub>4</sub>@BC (c,d)

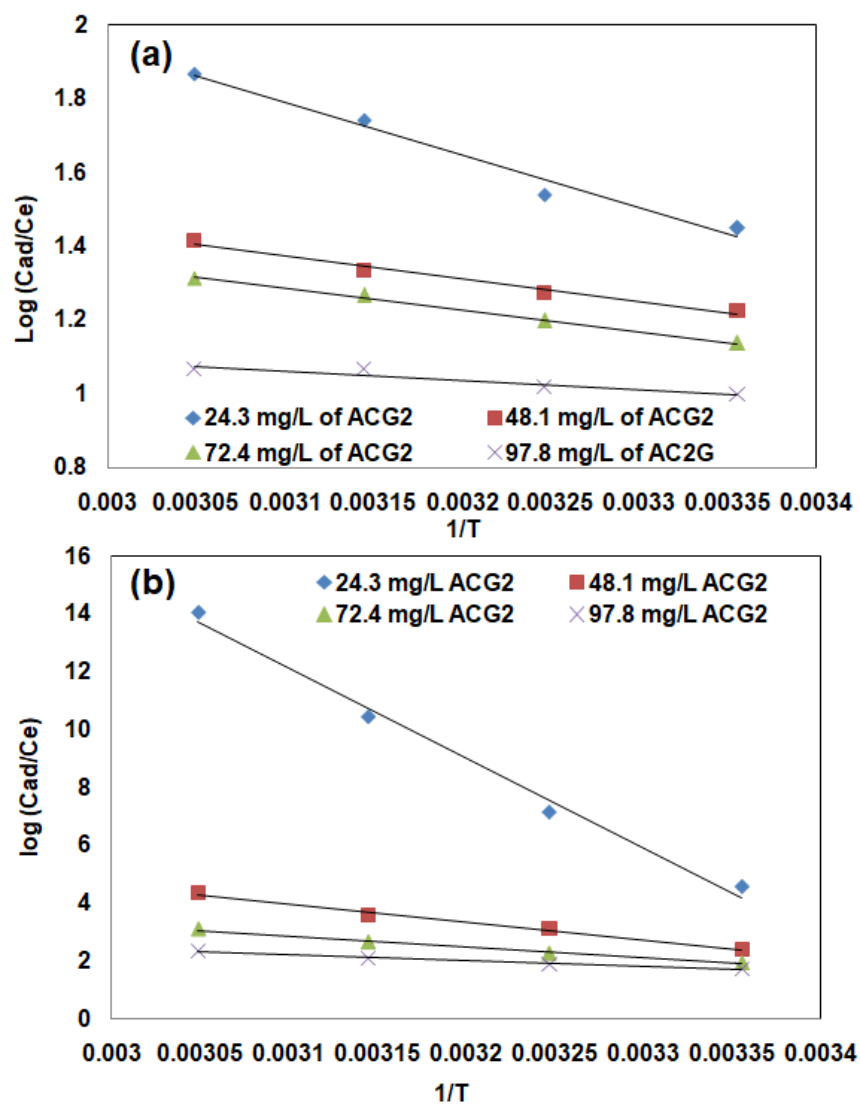

**Figure S 8.** Van't Hof plot of adsorption of ACG2 on BC (a) and Fe<sub>3</sub>O<sub>4</sub>@BC (b) adsorbents



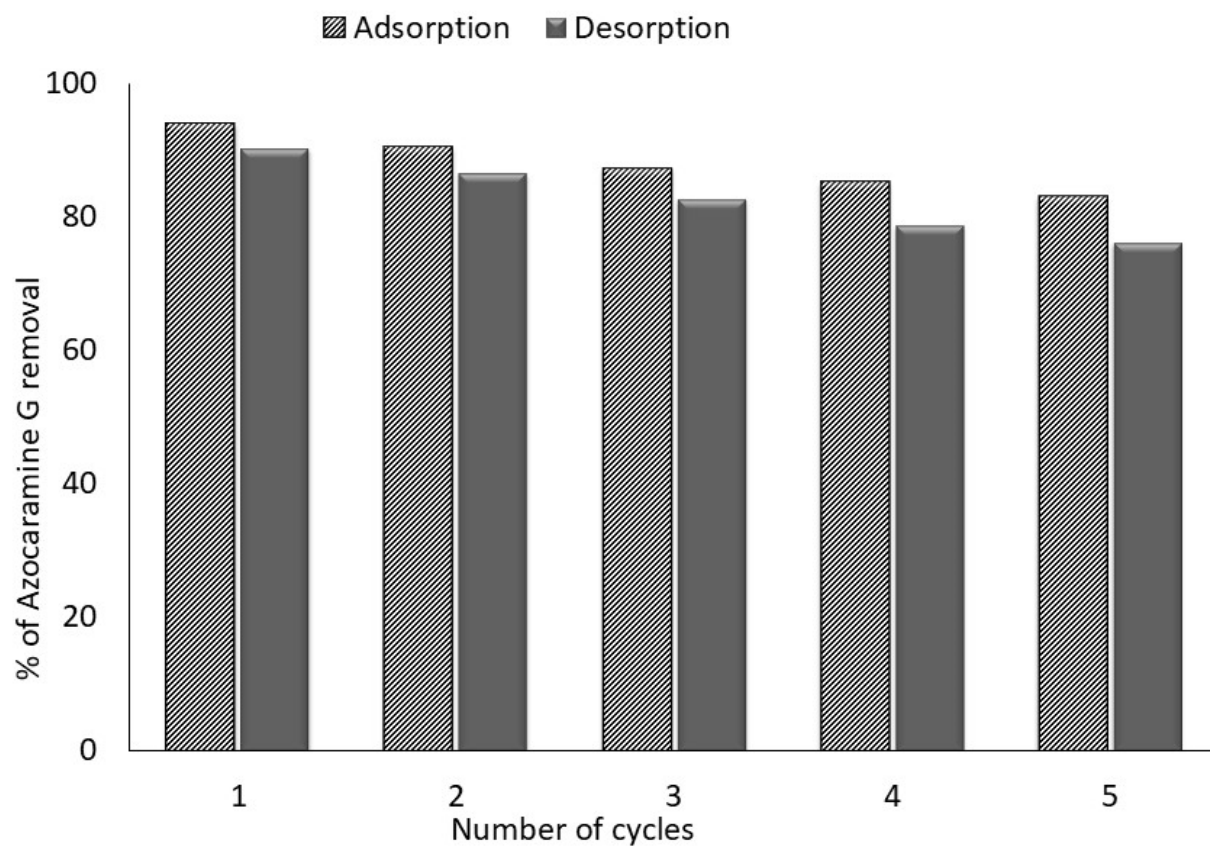

**Figure S 9.** Percentage adsorption of ACG2 at different reusability cycles  $\text{Fe}_3\text{O}_4@\text{BC}$
